# Supplementary material for: Mobile monitoring of urban air quality at high spatial resolution bylow-cost sensors: Impacts of COVID-19 pandemic lockdown
Source: Copernicus journal article supplement (doi:10.5194/acp-2020-1169), 2020-11-24
Supplement: Supplementary file 1 [file acp-2020-1169-supplement.pdf]

# SUPPLEMENTARY INFORMATION FOR

## Mobile monitoring of urban air quality at high spatial resolution by low-cost sensors: Impacts of COVID-19 pandemic lockdown

5 Shibao Wang<sup>1</sup>, Yun Ma<sup>1</sup>, Zhongrui Wang<sup>1</sup>, Lei Wang<sup>1</sup>, Xuguang Chi<sup>1</sup>, Aijun Ding<sup>1</sup>, Mingzhi Yao<sup>2</sup>, Yunpeng Li<sup>2</sup>, Qilin Li<sup>2</sup>, Mengxian Wu<sup>3</sup>, Ling Zhang<sup>3</sup>, Yongle Xiao<sup>3</sup>, Yanxu Zhang<sup>1</sup>

<sup>1</sup>School of Atmospheric Sciences, Nanjing University, Nanjing, China

<sup>2</sup>Beijing SPC Environment Protection Tech Company Ltd., Beijing, China

<sup>3</sup>Hebei Saihero Environmental Protection Hi-tech. Company Ltd., Shijiazhuang, China

Correspondence to: Yanxu Zhang (zhangyx@nju.edu.cn)

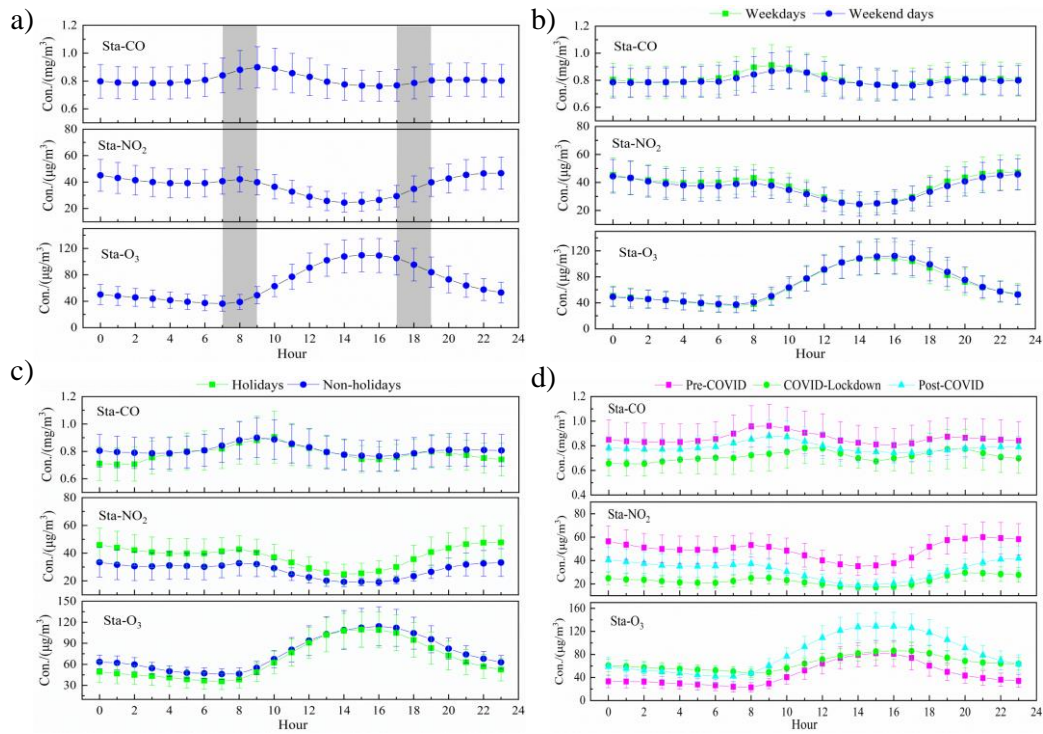

10

**Figure S1.** Diurnal cycles of three pollutant concentrations measured in rush/non-rush hours, weekdays/weekend days, holidays/non-holidays, and different stage of the COVID-19 pandemic by the stations sites data. Error bars show the standard deviation of observations. Gray areas represent the rush hours, and the other represents the non-rush hours.

15

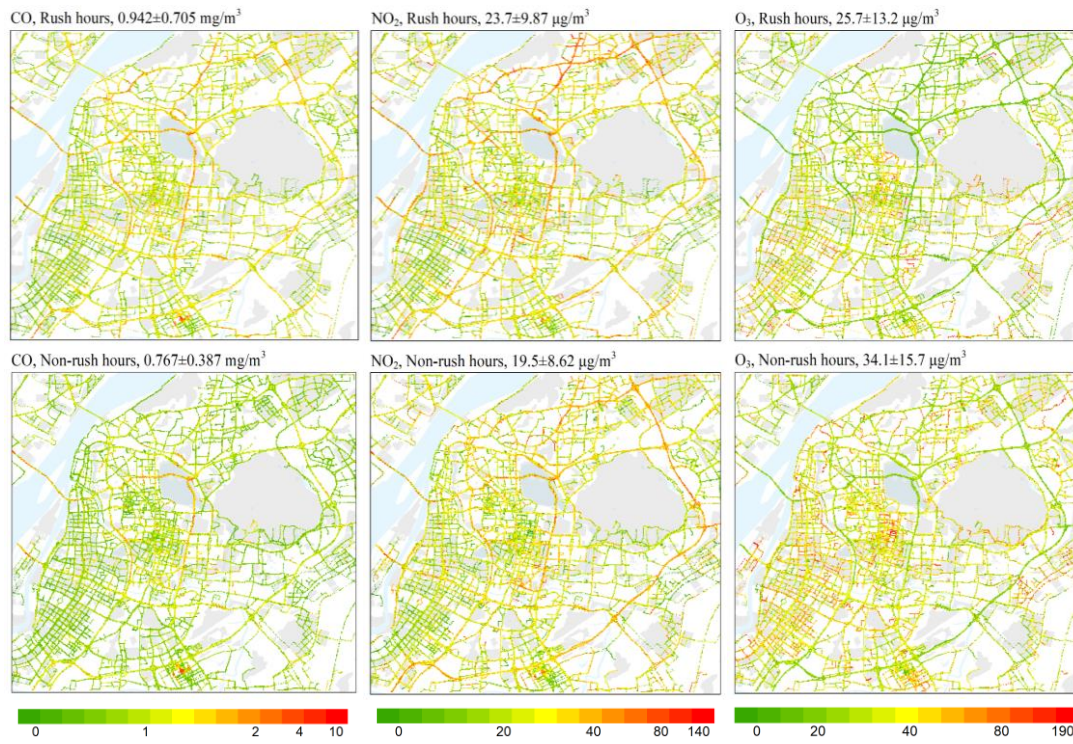

**Figure S2.** Spatial variation of CO, NO<sub>2</sub>, and O<sub>3</sub> concentrations in rush hours and non-rush hours in the research area. © OpenStreetMap contributors 2019. Distributed under a Creative Commons BY-SA License.

20

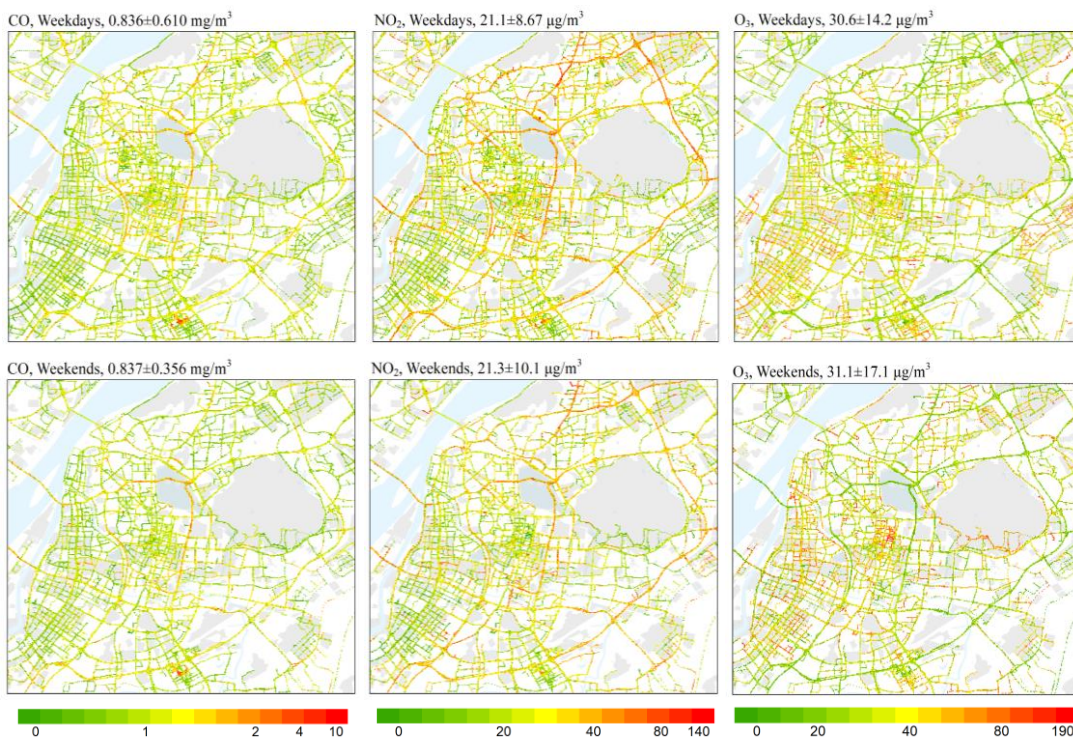

**Figure S3.** Spatial variation of CO, NO<sub>2</sub>, and O<sub>3</sub> concentrations in weekdays and weekend days in the research area. © OpenStreetMap contributors 2019. Distributed under a Creative Commons BY-SA License.



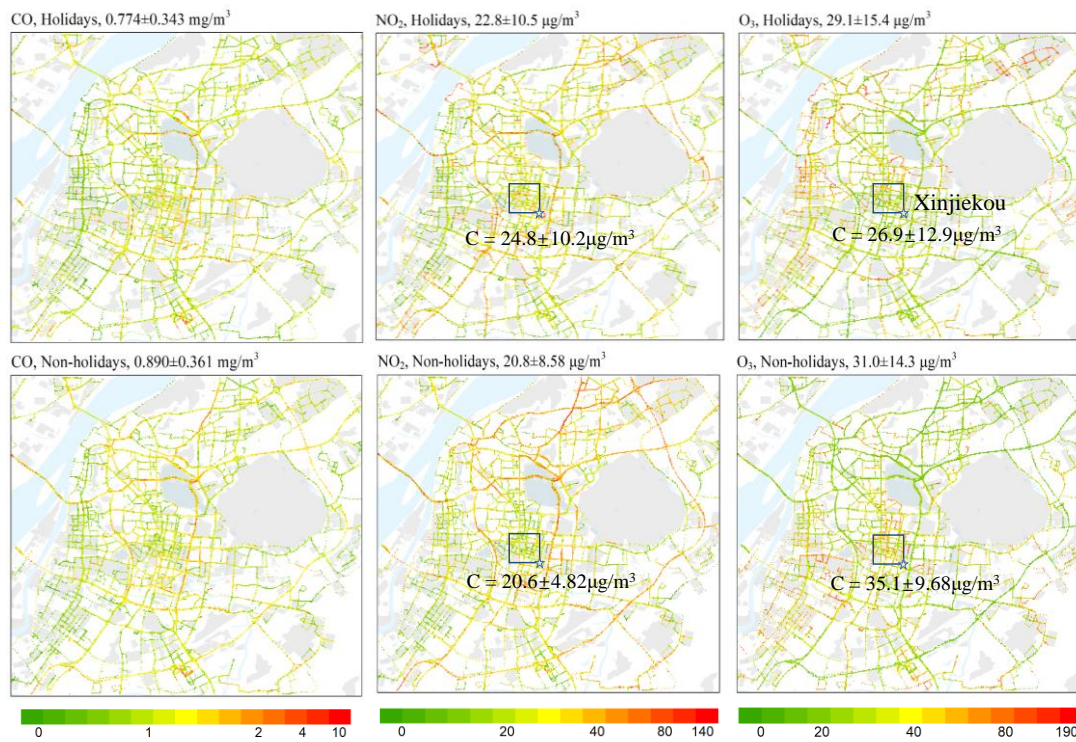

**Figure S4.** Spatial variation of CO, NO<sub>2</sub>, and O<sub>3</sub> concentrations in holiday and non-holiday in the research area. © OpenStreetMap contributors 2019. Distributed under a Creative Commons BY-SA License.
